# Supplementary material for: Temperature desynchronizes sugar and organic acid metabolism in ripening grapevine fruits and remodels their transcriptome
Source: PubMed Central journal article supplement (PMC4955140; doi:10.1186/s12870-016-0850-0), 2016-07-20

**A**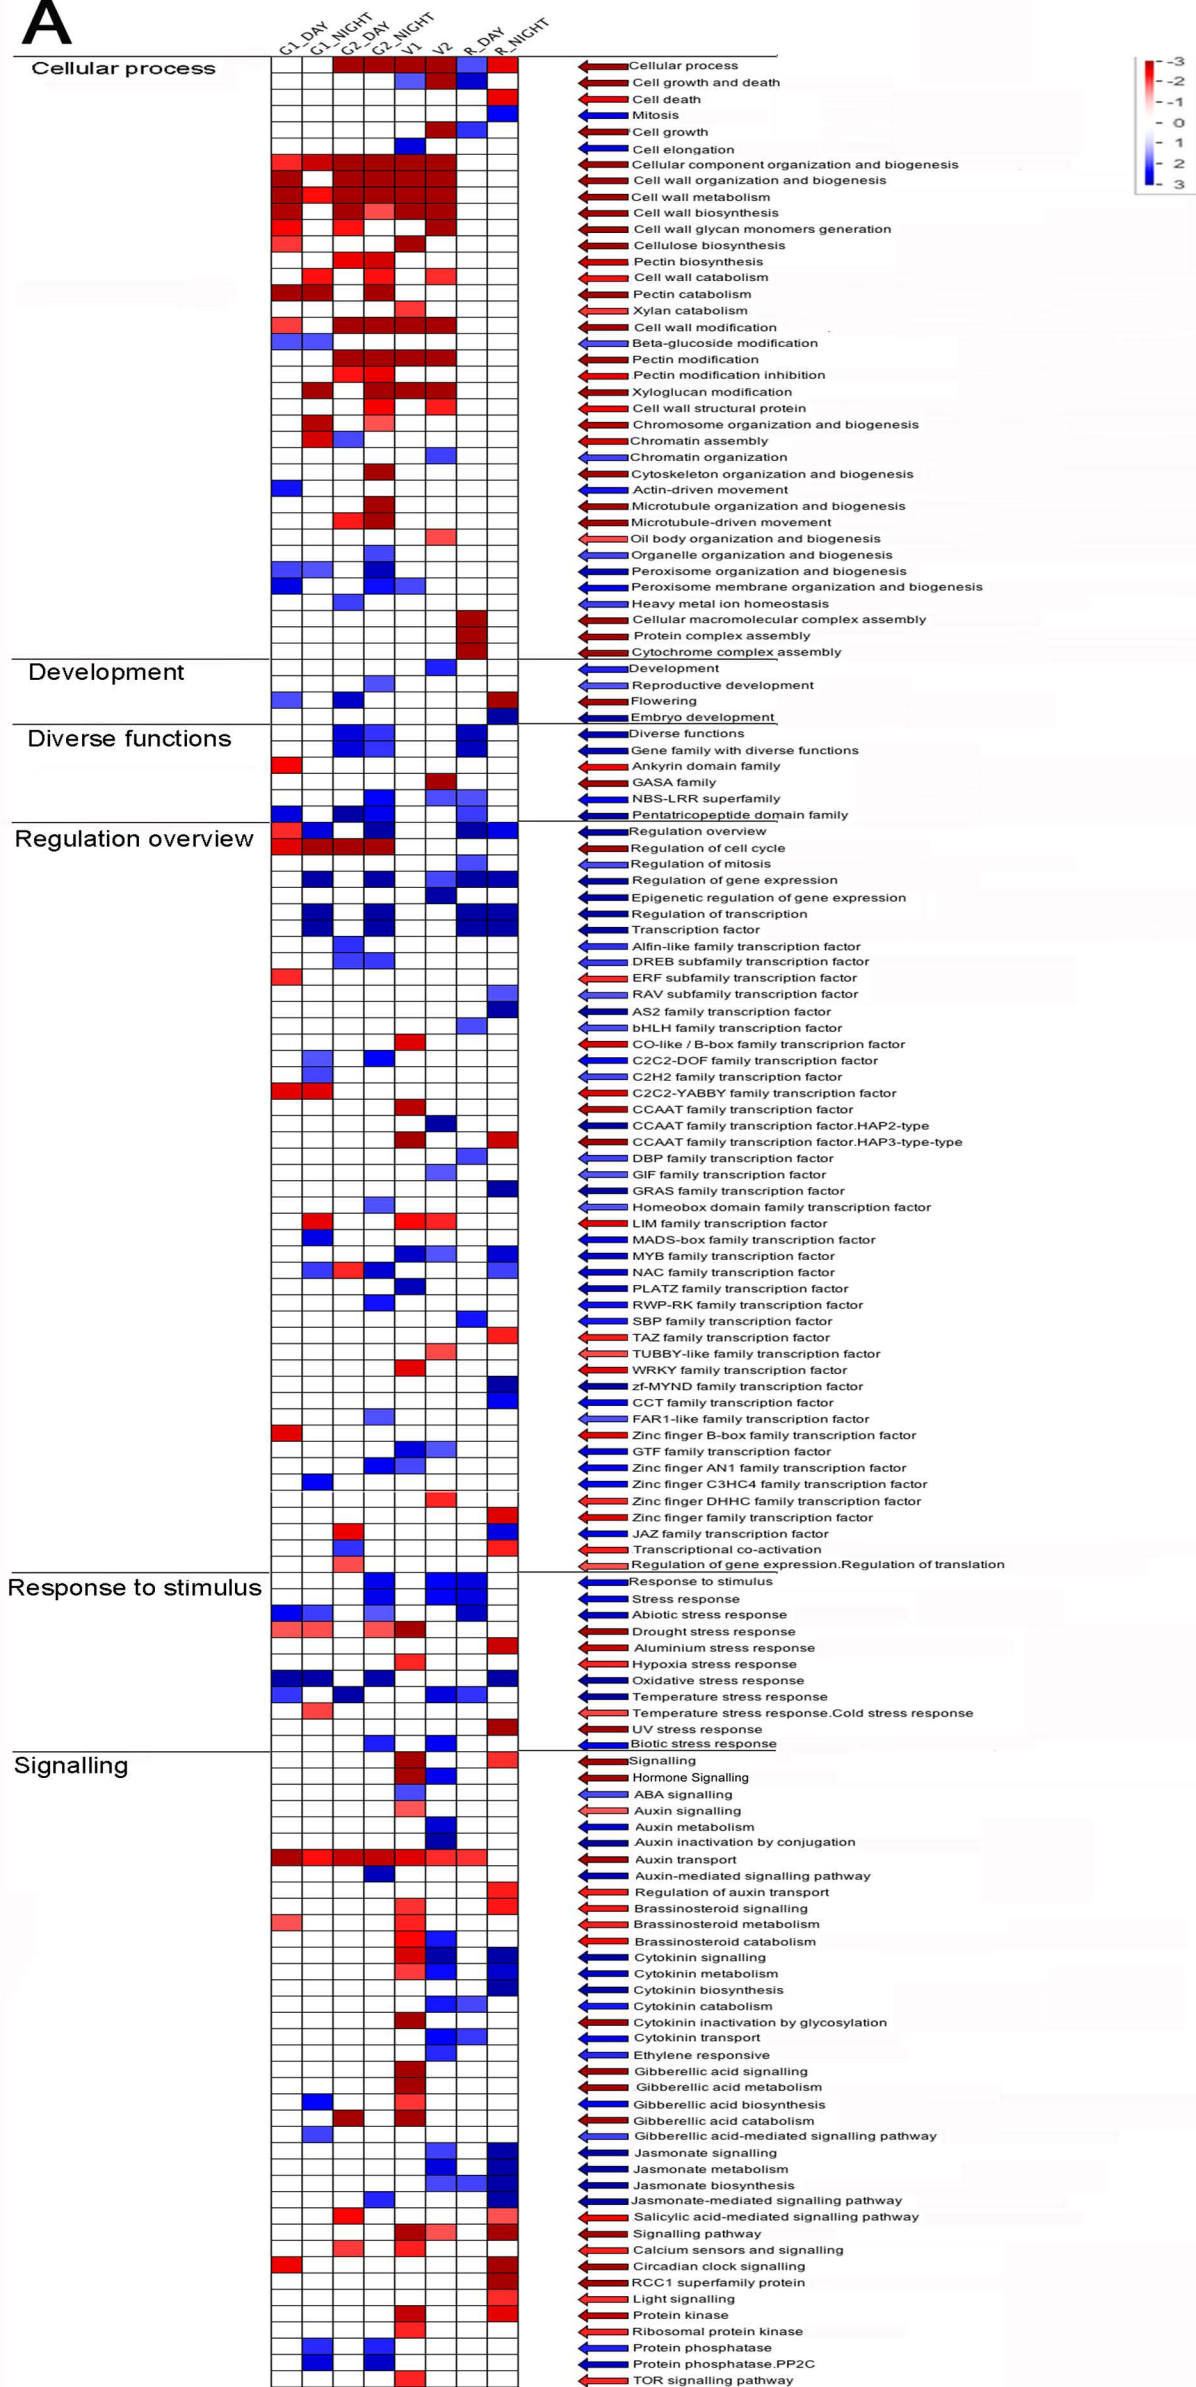

**B****Metabolism**

G1\_DAY G1\_NIGHT G2\_DAY G2\_NIGHT V1 V2 R\_DAY R\_NIGHT

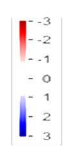**Primary metabolism****Amino acids****Carbohydrate****Coenzymes****Metabolites Energy****Lipid metabolism****Nucleic acid****Organic acid****Protein metabolism**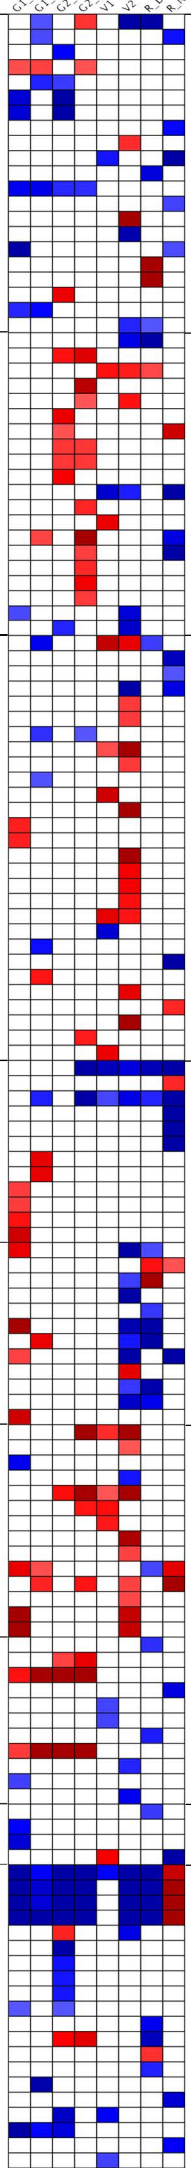

- Metabolism
- Metabolism Cellular metabolism
- Amino acid derivative metabolism
- Cyanamino acid metabolism
- Glycine betaine biosynthesis
- Iron metabolism
- Iron metabolism:Iron assimilation
- Nitrogen metabolism
- Nitrogen assimilation
- Oxidation reduction
- ZOG-Fe(II) oxygenase superfamily
- Alcohol dehydrogenase superfamily
- Copper oxidase family
- Cytochrome P450 oxidoreductase
- Phosphate metabolism
- Phytoalexin metabolism
- Phytoalexin biosynthesis
- Shikimate metabolism
- Sulfur metabolism:Sulfate assimilation
- Sulfur compound metabolism
- Metabolism Primary metabolism
- Amino acid metabolism
- Alanine and aspartate metabolism
- Amino acid biosynthesis
- Arginine and proline metabolism:Proline metabolism:Proline catabolism
- Aromatic amino acid metabolism
- Phenylalanine metabolism:Phenylalanine biosynthesis
- Tryptophan metabolism
- Tryptophan biosynthesis
- Tyrosine metabolism:Tyrosine catabolism
- Asparagine, aspartate metabolism
- Cysteine and methionine metabolism
- Cysteine metabolism:Cysteine biosynthesis
- Glutamate metabolism
- Glutamate biosynthesis
- Glutamate catabolism
- Glutamine biosynthesis
- Glycine metabolism
- Valine, leucine, and isoleucine metabolism
- Valine, leucine, and isoleucine biosynthesis
- Carbohydrate metabolism
- Carbohydrate oxidation reduction
- Glycerol-3-P shuttle
- Glycolysis and gluconeogenesis:Gluconeogenesis
- Pyruvate decarboxylation
- Pyruvate decarboxylation inhibition
- Glycosyl transference
- Monosaccharide metabolism
- Fructose and mannose metabolism
- Galactose metabolism
- Inositol phosphate metabolism
- Nucleotide sugar metabolism
- Xylose metabolism
- Xylose biosynthesis
- Oligosaccharide metabolism
- Glycan metabolism
- Glycan metabolism:Glycan catabolism
- N-Glycan metabolism
- N-Glycan metabolism:N-Glycan catabolism
- Oligosaccharide catabolism
- Raffinose metabolism
- Trehalose metabolism
- Polysaccharide metabolism:Beta-1,3 glucan metabolism:Beta-1,3 glucan catabolism
- Starch and sucrose metabolism:Starch biosynthesis and catabolism
- Starch branching
- Starch catabolism
- Sucrose biosynthesis
- Sucrose catabolism
- Coenzyme and prosthetic group metabolism
- Folate metabolism
- Glutathione metabolism
- Pyridoxine metabolism
- Riboflavin metabolism
- Riboflavin biosynthesis
- Thiamine metabolism
- Thiamine biosynthesis
- Cofactor metabolism
- Tetrapyrrole metabolism
- Chlorophyll metabolism
- Chlorophyll biosynthesis
- Generation of metabolite precursors and energy
- Electron transport
- Respiratory-chain phosphorylation
- Glyoxylate and dicarboxylate metabolism
- Glyoxylate cycle
- Photosynthesis
- Antenna proteins
- Calvin cycle
- Photosynthetic-chain phosphorylation
- Photosystem I
- Photosystem II
- Reaction center pigment biosynthesis
- Lipid metabolism
- Fatty acid biosynthesis
- Fatty acid elongation
- Oxylipin biosynthesis
- Glycerolipid metabolism
- Glycerophospholipid metabolism
- Glycerophospholipid biosynthesis
- Sphingolipid metabolism
- Sphingolipid biosynthesis
- Steroid metabolism
- Steroid biosynthesis
- Sterol biosynthesis
- Wax metabolism
- Wax biosynthesis
- Nucleobase, nucleoside, nucleotide, nucleic acid metabolism
- Nucleic acid metabolism
- DNA metabolism
- DNA catabolism
- DNA modification
- DNA methylation
- DNA repair
- DNA replication
- RNA metabolism
- RNA catabolism
- Nudix hydrolase family
- Organic acid metabolism:Carboxylic acid metabolism
- Propanoate metabolism
- Pyruvate fermentation
- Tartaric acid biosynthesis
- Protein metabolism and modification
- Protein folding
- Chaperone-mediated protein folding
- HSP-mediated protein folding
- Protein folding:Disulfide bond rearrangement
- Peptidyl prolyl isomerase-mediated protein folding
- Protein modification
- Protein deacetylation
- Histone deacetylation
- Protein SUMOylation
- Proteolysis
- Peptidase-mediated proteolysis
- Metallopeptidase-mediated proteolysis
- Subtilase-mediated proteolysis
- Vacuolar proteolysis
- Protease inhibition
- Translation
- Amino acid activation
- Translational elongation
- Translational termination

C

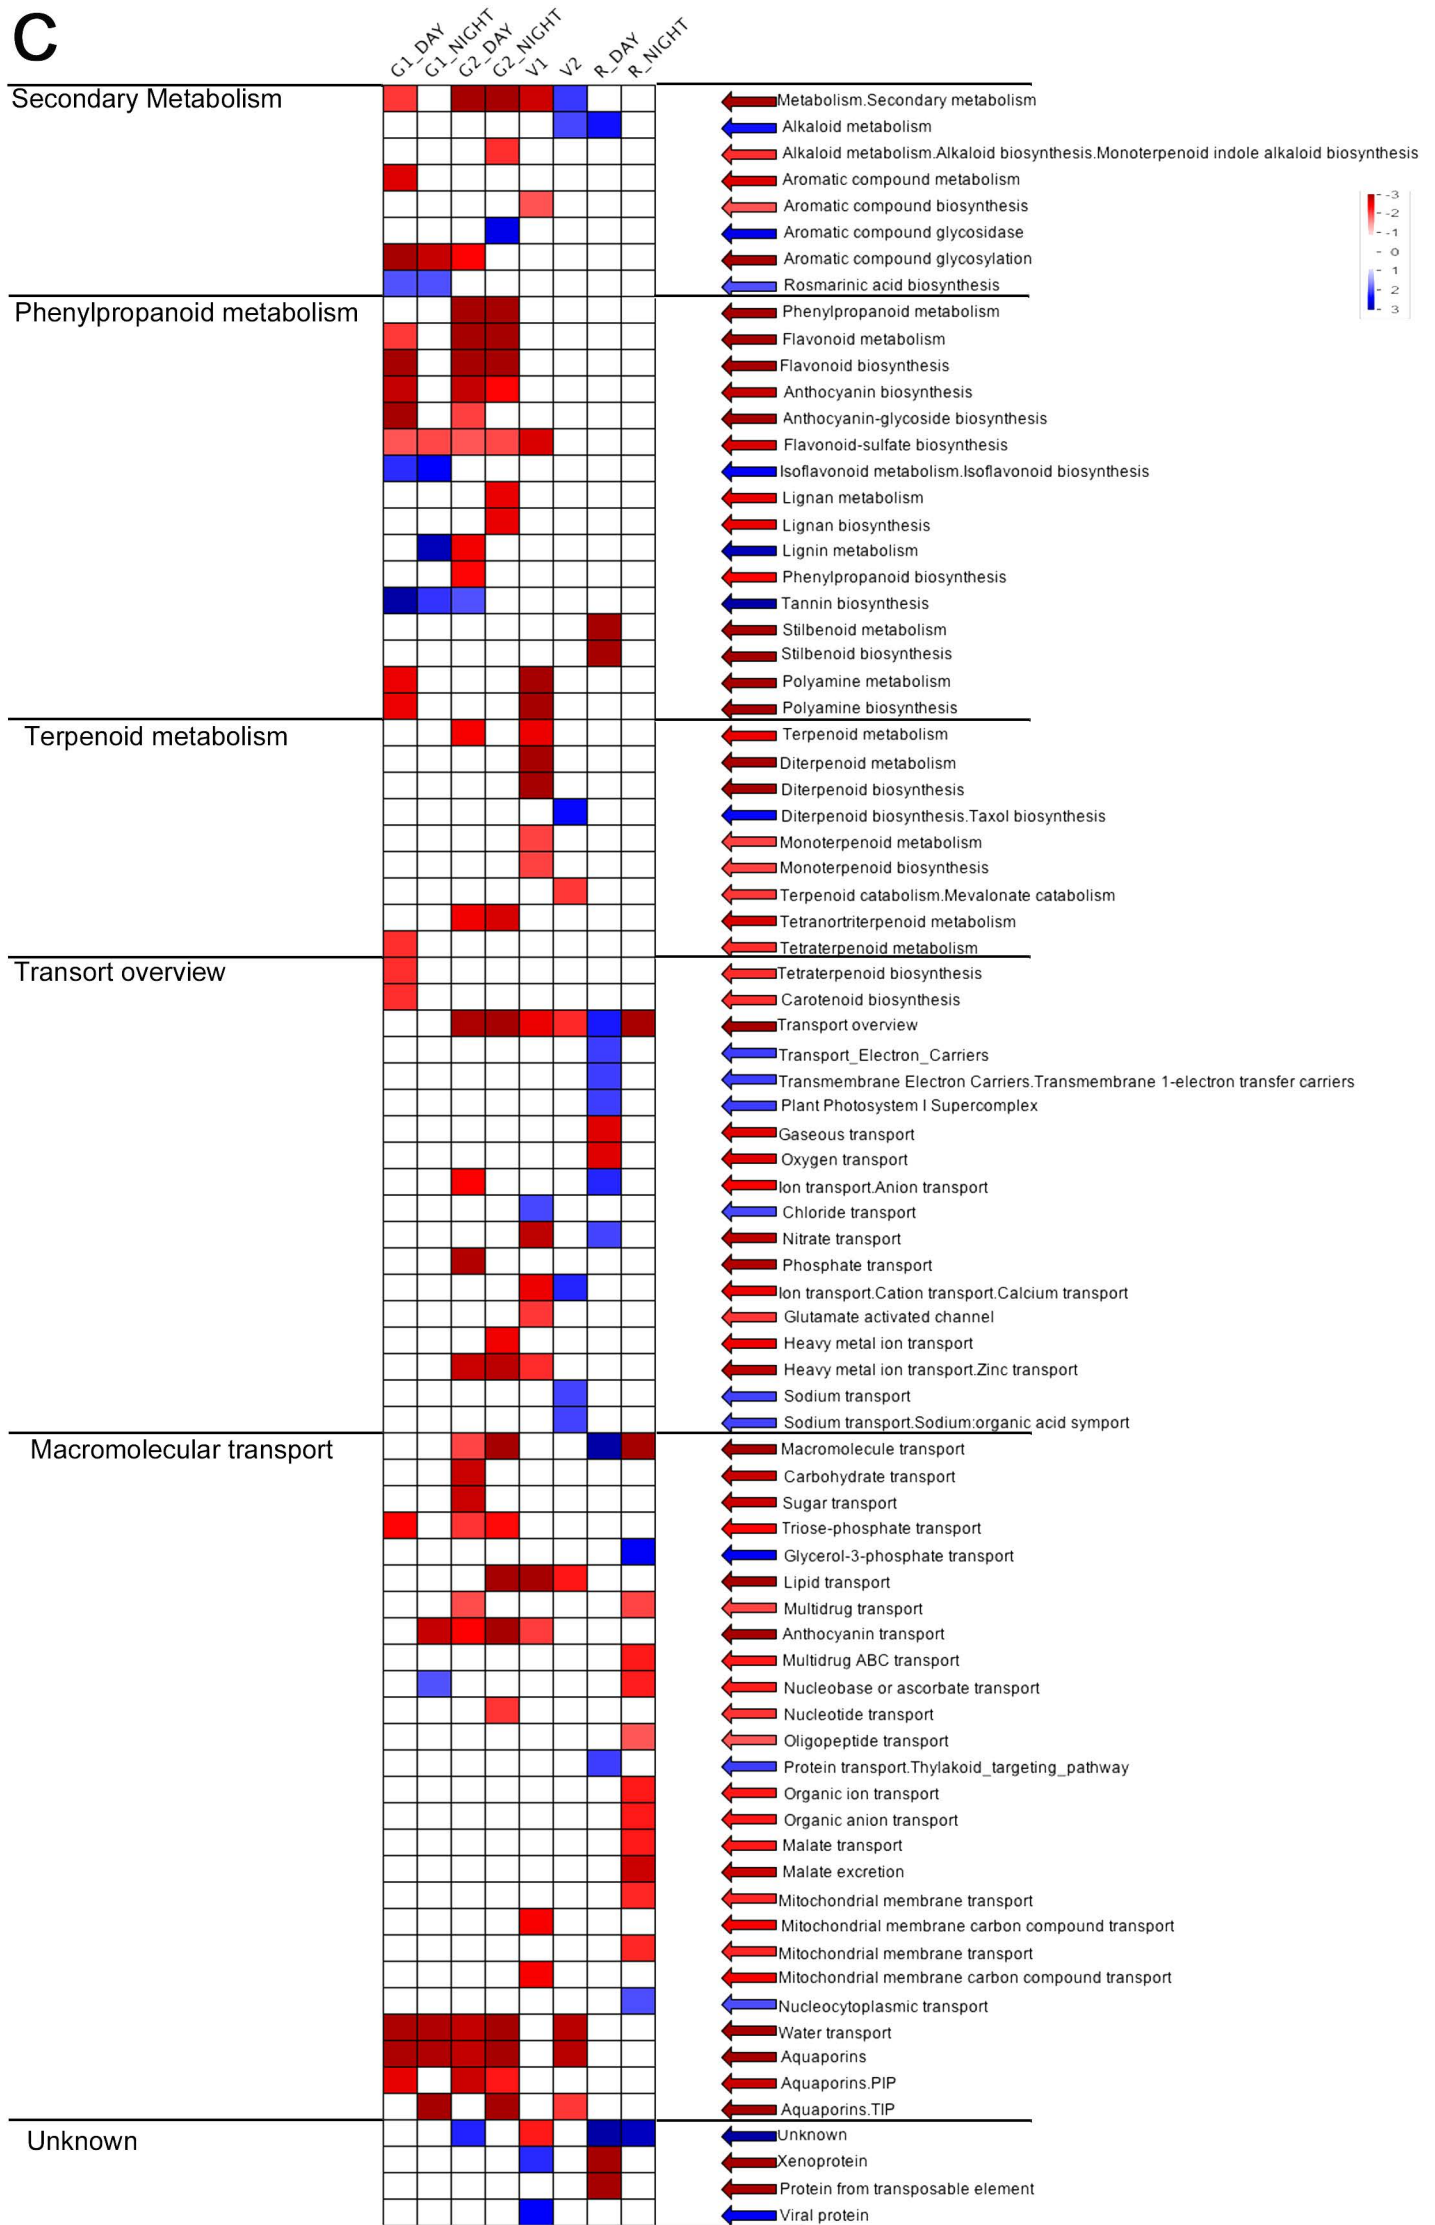

Supplement: 12870_2016_850_MOESM6_ESM.pdf [file 12870_2016_850_MOESM6_ESM.pdf]
