# Supplementary material for: Temperature desynchronizes sugar and organic acid metabolism in ripening grapevine fruits and remodels their transcriptome
Source: PubMed Central journal article supplement (PMC4955140; doi:10.1186/s12870-016-0850-0), 2016-07-20

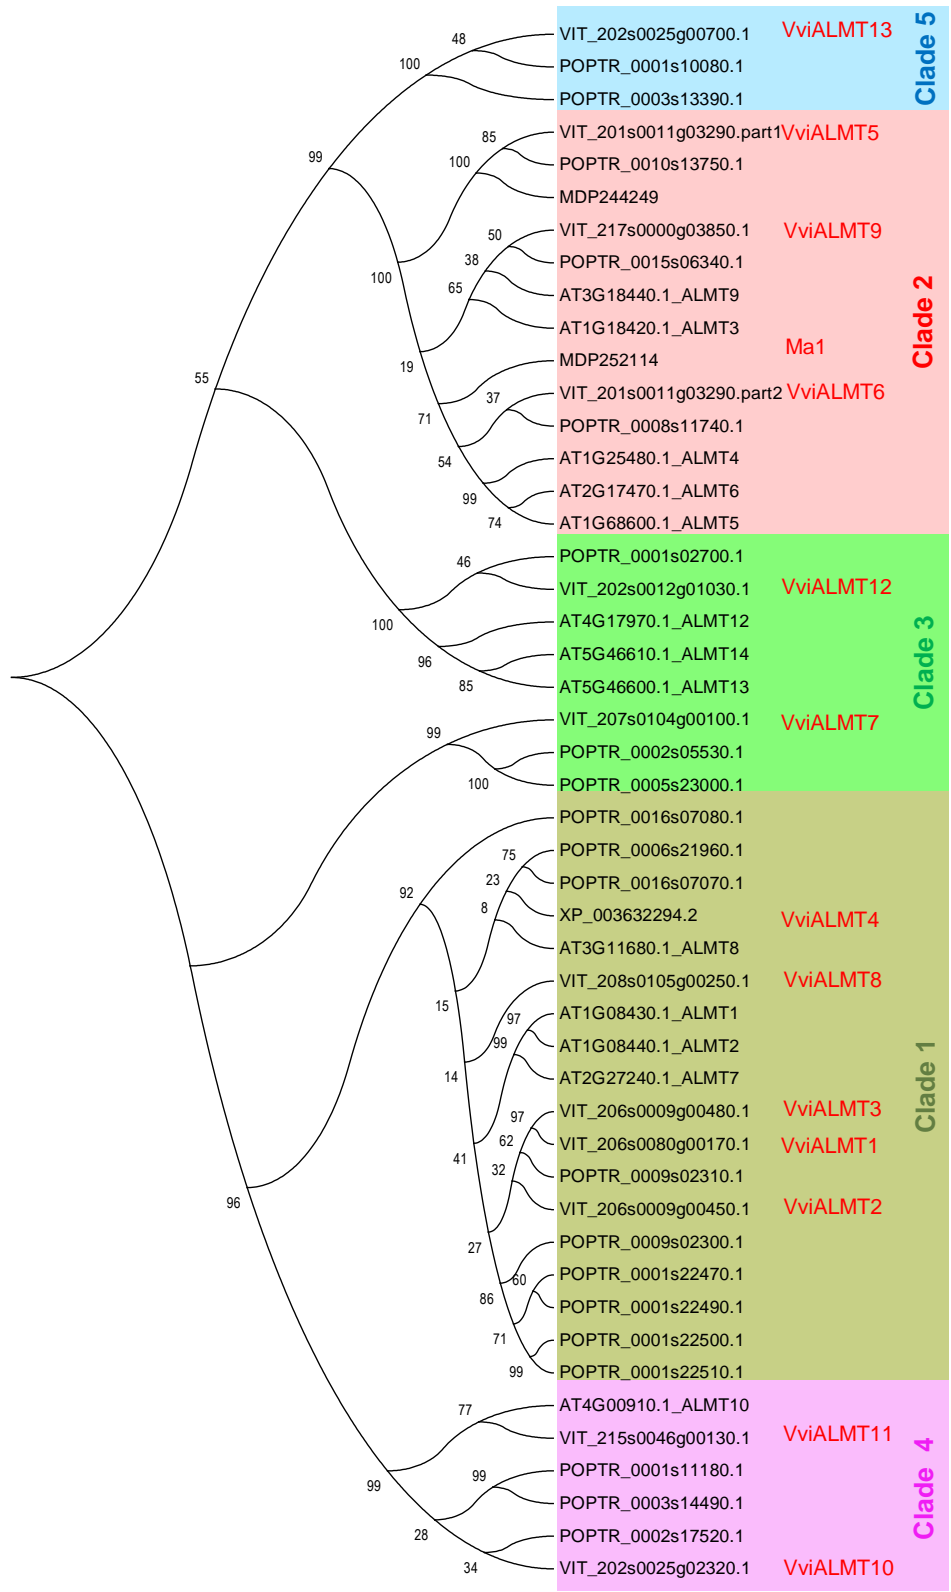

Supplement: 12870_2016_850_MOESM10_ESM.pdf [file 12870_2016_850_MOESM10_ESM.pdf]
